# Supplementary material for: MoSe2/C60 heterojunction may be efficient for photovoltaic applications: time-domain ab initio analysis of interfacial charge separation and recombination dynamics
Source: Royal Society of Chemistry journal article supplement (doi:10.1039/d3qi01105d), 2023-01-01
Supplement: d3qi01105d1.pdf [file d3qi01105d1.pdf]

*Supporting Information*

*for*

MoSe<sub>2</sub>/C<sub>60</sub> Heterojunction May Be Efficient for Photovoltaic  
Applications: Time-Domain Ab Initio Analysis of Interfacial  
Charge Separation and Recombination Dynamics

Pingzhi Zhang,<sup>1#</sup> Ting Xue,<sup>1#</sup> Zhiguo Wang,<sup>1</sup> Wei Wei,<sup>2</sup> Xiaoyin Xie,<sup>3\*</sup> Ran Jia,<sup>2\*</sup>  
Wei Li<sup>1\*</sup>

<sup>1</sup>*School of Chemistry and Materials Science, Hunan Agricultural University, Changsha, PR China*

<sup>2</sup>*Institute of Theoretical Chemistry, College of Chemistry, Jilin University, 130023 Changchun, PR China*

<sup>3</sup>*School of Chemistry and Chemical Engineering, Hubei Polytechnic University, Huangshi, 435003, China*

# Both authors contributed equally

\*Corresponding authors:

[xyxie@hbpu.edu.cn](mailto:xyxie@hbpu.edu.cn) (X.Y.X.)

[jiaran@jlu.edu.cn](mailto:jiaran@jlu.edu.cn) (R.J.)

[weili@hunau.edu.cn](mailto:weili@hunau.edu.cn) (W.L.)

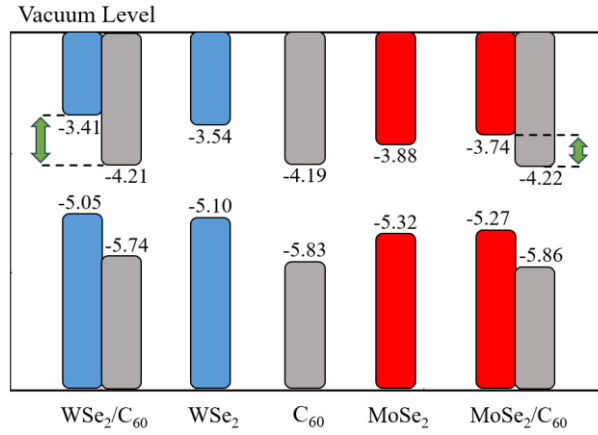

**Figure S1.** Band edge energies of the TMD/C<sub>60</sub> heterostructures, the pristine MoSe<sub>2</sub> and WSe<sub>2</sub>, and the pristine C<sub>60</sub> calculated using PBE, with vacuum energy as reference level.

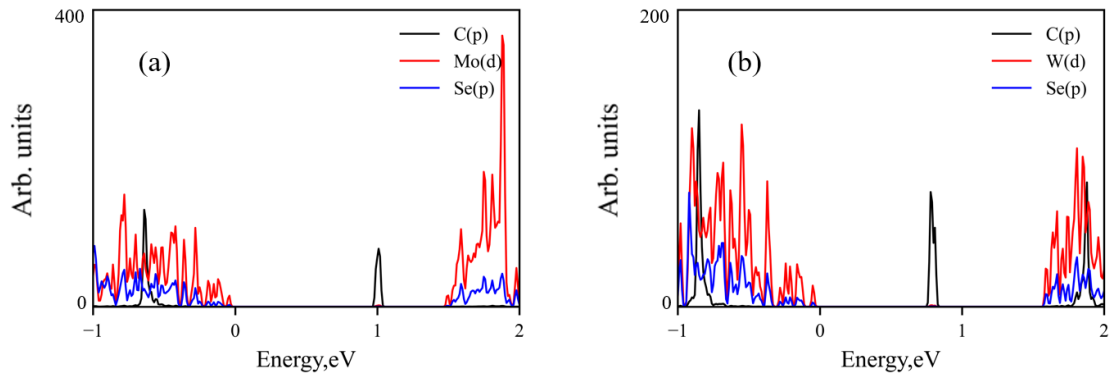

**Figure S2.** Atom and orbital resolved density of states for (a) MoSe<sub>2</sub>/C<sub>60</sub> and (b) WSe<sub>2</sub>/C<sub>60</sub> calculated using PBE function with 4x4x1 kpoints.

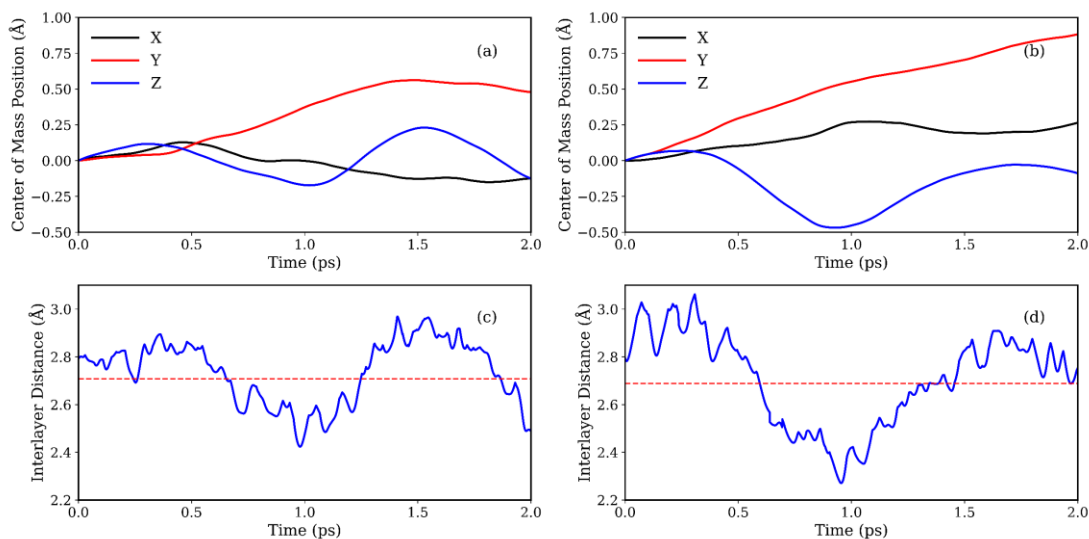

**Figure S3.** The center of mass position of C<sub>60</sub> in a 2ps MD trajectory for (a) MoSe<sub>2</sub>/C<sub>60</sub> and (b) WSe<sub>2</sub>/C<sub>60</sub> heterostructures. Time evolution of the interlayer distances for (a) MoSe<sub>2</sub>/C<sub>60</sub> and (b) WSe<sub>2</sub>/C<sub>60</sub> heterostructures. Interlayer distance is defined as the distance between the bottom C atom of C<sub>60</sub> and the top of Se atom of TMD.

**Table S1.** Computed donor-acceptor overlap (arb. unit) based on the optimized ground state structure at 0K.

|                                    | Electron transfer     | Interface charge recombination | Intra-TMD recombination |
|------------------------------------|-----------------------|--------------------------------|-------------------------|
| MoSe <sub>2</sub> /C <sub>60</sub> | $4.48 \times 10^{-5}$ | $3.02 \times 10^{-5}$          | $1.87 \times 10^{-3}$   |
| WSe <sub>2</sub> /C <sub>60</sub>  | $4.41 \times 10^{-5}$ | $1.28 \times 10^{-5}$          | $1.78 \times 10^{-3}$   |

**Table S2.** Lowest-lying excitation energy computed by delta-SCF approach

|                        | MoSe <sub>2</sub> /C <sub>60</sub> | WSe <sub>2</sub> /C <sub>60</sub> | MoSe <sub>2</sub> | WSe <sub>2</sub> | C <sub>60</sub> |
|------------------------|------------------------------------|-----------------------------------|-------------------|------------------|-----------------|
| Excitation energy (eV) | 1.45                               | 1.39                              | 1.45              | 1.56             | 1.64            |

**Table S3.** The calculated key orbital energies and band offset for electron transfer (TMD CBM/C<sub>60</sub> LUMO) and charge recombination (C<sub>60</sub> LUMO/TMD VBM) using PBE, PBE+SOC level of theory for MoSe<sub>2</sub>/C<sub>60</sub> and WSe<sub>2</sub>/C<sub>60</sub> heterostructures. Unit in eV.

|                                    |                                              | PBE    | PBE+SOC |
|------------------------------------|----------------------------------------------|--------|---------|
| MoSe <sub>2</sub> /C <sub>60</sub> | MoSe <sub>2</sub> -CBM                       | 1.487  | 1.378   |
|                                    | C <sub>60</sub> -LUMO                        | 1.002  | 0.902   |
|                                    | MoSe <sub>2</sub> -VBM                       | -0.048 | -0.05   |
|                                    | MoSe <sub>2</sub> -CBM/C <sub>60</sub> -LUMO | 0.485  | 0.476   |
| WSe <sub>2</sub> /C <sub>60</sub>  | WSe <sub>2</sub> -CBM                        | 1.586  | 1.250   |
|                                    | C <sub>60</sub> -LUMO                        | 0.787  | 0.547   |
|                                    | WSe <sub>2</sub> -VBM                        | -0.051 | -0.052  |
|                                    | WSe <sub>2</sub> -CBM/C <sub>60</sub> -LUMO  | 0.799  | 0.703   |
| MoSe <sub>2</sub>                  | CBM                                          | 1.371  | 1.288   |
|                                    | VBM                                          | -0.075 | -0.047  |
|                                    | VBM/CBM                                      | 1.446  | 1.335   |
| WSe <sub>2</sub>                   | CBM                                          | 1.479  | 1.207   |
|                                    | VBM                                          | -0.073 | -0.053  |
|                                    | VBM/CBM                                      | 1.552  | 1.26    |
